# Supplementary material for: Community drivers of tuberculosis diagnostic delay in Kampala, Uganda: a retrospective cohort study
Source: Springer Nature journal article supplement (doi:10.1186/s12879-021-06352-9), 2021-07-04
Supplement: MOESM1 [file 19330332]

**Supplemental material to accompany Community drivers of tuberculosis diagnostic delay in Kampala, Uganda: A retrospective cohort study.**

1. Complete list of all predictors (highlighted are on continuous scale)

**Supplemental Table 1: List of predictors included in analysis.**

|                                                                       |                                                                            |
|-----------------------------------------------------------------------|----------------------------------------------------------------------------|
| Age                                                                   | Experienced, or was concerned about, appetite loss or weight loss - No/Yes |
| Monthly income*                                                       | Experienced, or was concerned about, bone or joint pain - No/Yes           |
| Proportion of contacts in non-TB provider category (10% increments)** | Experienced, or was concerned about, coughing blood or chest pain - No/Yes |
| Number of symptoms prompting care-seeking                             | Experienced, or was concerned about, malaise - No/Yes                      |
| Number of cough symptoms prompting care-seeking                       | Experienced, or was concerned about, night sweats or fever - No/Yes        |
| Number of times cough medication received                             | Bloody sputum prompted care-seeking - No/Yes                               |
| Total cost for care*                                                  | Frequent cough prompted care-seeking - No/Yes                              |
| Daily earnings lost while seeking care*                               | Reported no prompts to seek care                                           |
| Sex                                                                   | No relief from self-medication prompted care-seeking - No/Yes              |
| Marital status                                                        | Painful cough prompted care-seeking - No/Yes                               |
| Employed - No/Yes                                                     | TV/Radio advertisement prompted care-seeking - No/Yes                      |
| Residence – division of residence                                     | Sought care for appetite loss or weight loss - No/Yes                      |
| Smoking status                                                        | Sought care for bone or joint pain - No/Yes                                |
| HIV status                                                            | Sought care for coughing blood or chest pain - No/Yes                      |
| First TB episode – No/Yes                                             | Sought care for malaise - No/Yes                                           |
| TB was suspected - No/Yes                                             | Sought care for night sweats or fever - No/Yes                             |
| Received cough medication - No/Yes                                    | Evaluated for TB due to appetite loss or weight loss - No/Yes              |
| Bought supplements - No/Yes                                           | Evaluated for TB due to bone or joint pain - No/Yes                        |
| Cough disrupted daytime activity - No/Yes                             | Evaluated for TB due to coughing blood or chest pain – No/No/Yes           |
| Cough disrupted Night - No/Yes                                        | Evaluated for TB due to malaise - No/Yes                                   |
| Knows appetite loss or weight loss is symptom of TB - No/Yes          | Evaluated for TB due to night sweats or fever - No/Yes                     |
| Knows bone or joint pain is symptom of TB - No/Yes                    | Diagnosis location (private or government clinics or hospitals)            |
| Knows coughing blood or chest pain is symptom of TB - No/Yes          |                                                                            |
| Knows malaise is symptom of TB - No/Yes                               |                                                                            |
| Knows night sweats or fever is symptom of TB - No/Yes                 |                                                                            |

\*UGX, Ugandan Shillings. In the study year, 2017, the conversion rate for 1 US dollar was 3616.24 UGX.

\*\*Coefficient should be read as the increase in delay days associated with each increase of 0.1 in the proportion of contacts that belong in the non-TB provider category

## 2. Feature engineering during the analysis step:

During data cleaning, and analysis, variables were cleaned and summarized to reduce the dataset to a meaningful 49 predictors (listed above). The majority of the changes were made to combine information for each participant's numerous contacts to calculate total community contact delay.

Below are details of how some variables underwent additional recoding during the analysis step of the study.

Code for changes made during the data analysis step, rather than the data cleaning step, is included in the data analysis R file, while the data cleaning code is in a separate file.

### *Changes:*

All numeric variables were centered and scaled.

NAs in delay time categories were set to 0 days, as these indicate no time spent in that portion of the pathway.

Marital status levels of "Widowed", "Separated/Divorced", and "Single/Never Married" were set as "Not currently married", in contrast to "Married/Cohabiting"

For analysis, unknown HIV status was coded as NA (for 2 participants)

Smoking status was coded as "Current or former smoker" versus "Never smoked".

Diagnosis location was coded as "Government" versus "Private" facilities.

Divisions of residence included "Central", "Rubaga", "Kawempe", "Makindye", "Nakawa" and "Other", but was coded as "Rubaga" (location of study clinics and most common response) versus "Other".

## 3. Results of all bivariate analyses (significant results highlighted)

### **Supplemental Table 2: Complete results of bivariate linear regression for all included predictors**

| Variable                                                              | Estimate | Std. Error | Pr(> t ) |
|-----------------------------------------------------------------------|----------|------------|----------|
| <b>Outcome: Community contact delay</b>                               |          |            |          |
| Age                                                                   | 2.5286   | 3.3339     | 0.4491   |
| Monthly Income*                                                       | 6.1475   | 3.2833     | 0.0627   |
| Proportion of contacts in non-TB provider category (10% increments)** | 1.1974   | 3.1985     | 0.0002   |
| Number of symptoms prompting care-seeking                             | -3.8546  | 3.3015     | 0.2444   |
| Number of cough symptoms prompting care-seeking                       | -2.8465  | 3.3068     | 0.3904   |
| Times Cough Medication Received                                       | 11.3507  | 3.2024     | 0.0005   |
| Total Cost for Care*                                                  | 10.8727  | 3.2189     | 0.0009   |
| Daily Earnings Lost*                                                  | 3.7072   | 3.3113     | 0.2643   |
| Sex - Male                                                            | -2.3080  | 6.8661     | 0.7371   |
| Marital Status - Currently married                                    | -7.2428  | 6.8833     | 0.2940   |

|                                                                         |                 |         |        |
|-------------------------------------------------------------------------|-----------------|---------|--------|
| Employed - Yes                                                          | 13.4140         | 8.1932  | 0.1032 |
| Residence - Rubaga                                                      | <i>Baseline</i> |         |        |
| Residence - Other                                                       | 6.5002          | 6.5584  | 0.3229 |
| Smoking Status - Never Smoked                                           | <i>Baseline</i> |         |        |
| Smoking Status - Current or former smoker                               | 13.4246         | 7.9427  | 0.0926 |
| HIV Status - Positive                                                   | 0.4517          | 7.1089  | 0.9494 |
| First TB - No                                                           | -13.7334        | 11.6451 | 0.2397 |
| TB was Suspected - Yes                                                  | -16.3629        | 6.6157  | 0.0143 |
| Others Expressed Concern about Symptoms - Yes                           | 1.5097          | 6.6840  | 0.8216 |
| Received Cough Medication - Yes                                         | 40.6103         | 10.4649 | 0.0001 |
| Bought Supplements - Yes                                                | -10.1309        | 7.3693  | 0.1708 |
| Cough Disrupted Daytime Activity - Yes                                  | 17.9784         | 6.5977  | 0.0070 |
| Cough Disrupted Night - Yes                                             | 6.5899          | 7.8770  | 0.4039 |
| Coughed More in Night or Day - Night                                    | -5.0416         | 8.0862  | 0.5337 |
| Knows Appetite loss or Weight loss is Symptom of TB - Yes               | -18.4473        | 7.8439  | 0.0197 |
| Knows Bone or joint pain is Symptom of TB - Yes                         | 16.6018         | 26.7553 | 0.5357 |
| Knows Coughing blood or chest pain is Symptom of TB - Yes               | -14.2328        | 6.5321  | 0.0306 |
| Knows Malaise is Symptom of TB - Yes                                    | -12.7396        | 17.6957 | 0.4724 |
| Knows Night sweats or fever is Symptom of TB - Yes                      | -6.7087         | 7.2766  | 0.3577 |
| Experienced, or was concerned about, Appetite loss or Weight loss - Yes | 10.5792         | 7.9873  | 0.1869 |
| Experienced, or was concerned about, Bone or joint pain - Yes           | 21.3163         | 7.1286  | 0.0032 |
| Experienced, or was concerned about, Coughing blood or chest pain - Yes | -13.0938        | 19.0649 | 0.4930 |
| Experienced, or was concerned about, Malaise - Yes                      | 10.4962         | 6.9875  | 0.1347 |
| Experienced, or was concerned about, Night sweats or fever - Yes        | -7.4541         | 11.6748 | 0.5239 |
| Bloody Sputum Prompted Care-Seeking - Yes                               | -6.4914         | 11.1081 | 0.5597 |
| Frequent Cough Prompted Care-Seeking - Yes                              | -2.6543         | 6.6666  | 0.6910 |
| Reported No Prompts to Seek Care                                        | -31.2900        | 32.6377 | 0.3389 |
| No Relief from Self-Medication Prompted Care-Seeking - Yes              | -7.8980         | 7.8707  | 0.3169 |
| Painful Cough Prompted Care-Seeking - Yes                               | -2.4608         | 8.1664  | 0.7635 |
| TV/Radio Advertisement Prompted Care-Seeking - Yes                      | 8.3038          | 8.3050  | 0.3186 |
| Sought Care for Appetite loss or Weight loss - Yes                      | -5.5524         | 10.2147 | 0.5874 |
| Sought Care for Bone or joint pain - Yes                                | 39.2711         | 15.4537 | 0.0118 |
| Sought Care for Coughing blood or chest pain - Yes                      | 10.0009         | 7.2569  | 0.1698 |

|                                                            |                 |         |        |
|------------------------------------------------------------|-----------------|---------|--------|
| Sought Care for Malaise - Yes                              | 4.9782          | 19.0849 | 0.7945 |
| Sought Care for Night sweats or fever - Yes                | -4.9865         | 7.0192  | 0.4783 |
| Evaluated for TB due to Appetite loss or Weight loss - Yes | -1.4515         | 7.4599  | 0.8459 |
| Evaluated for TB due to Bone or joint pain - Yes           | 25.6708         | 12.6358 | 0.0436 |
| Evaluated for TB due to Coughing blood or chest pain - Yes | -4.3563         | 6.6017  | 0.5101 |
| Evaluated for TB due to Malaise - Yes                      | -11.3390        | 19.0708 | 0.5528 |
| Evaluated for TB due to Night sweats or fever - Yes        | -15.1500        | 6.5472  | 0.0217 |
| DX Location - Government facility                          | <i>Baseline</i> |         |        |
| DX Location - Private facility                             | -7.2542         | 6.6927  | 0.2798 |

| Variable                                              | Estimate        | Std. Error | Pr(> t ) |
|-------------------------------------------------------|-----------------|------------|----------|
| <b>Outcome: Non-TB provider contribution to delay</b> |                 |            |          |
| Age (years)                                           | 3.3092          | 2.2830     | 0.1489   |
| Monthly Income*                                       | 0.9407          | 2.2763     | 0.6799   |
| Number of symptoms prompting care-seeking             | -1.3697         | 2.2751     | 0.5479   |
| Number of cough symptoms prompting care-seeking       | -0.4274         | 2.2771     | 0.8513   |
| Times Cough Medication Received                       | 8.8505          | 2.1975     | 0.0001   |
| Total Cost for Care*                                  | 6.5592          | 2.2275     | 0.0036   |
| Daily Earnings Lost*                                  | 2.5244          | 2.2816     | 0.2699   |
| Sex - Male                                            | -3.3699         | 4.7143     | 0.4756   |
| Marital Status - Currently married                    | -4.2241         | 4.7350     | 0.3735   |
| Employment - Yes                                      | 5.9774          | 5.6612     | 0.2924   |
| Residence - Rubaga                                    | <i>Baseline</i> |            |          |
| Residence - Other                                     | -1.4318         | 4.6086     | 0.7564   |
| Smoking Status - Never Smoked                         | <i>Baseline</i> |            |          |
| Smoking Status - Current or former smoker             | 5.1891          | 5.4923     | 0.2460   |
| HIV Status - Positive                                 | -0.3654         | 4.8878     | 0.9405   |
| First TB - No                                         | -11.6065        | 7.9894     | 0.1479   |
| TB was Suspected - Yes                                | -9.8881         | 4.6571     | 0.0350   |
| Others Expressed Concern about Symptoms - Yes         | -2.7862         | 4.6822     | 0.5525   |
| Received Cough Medication - Yes                       | 23.3260         | 7.2776     | 0.0016   |
| Bought Supplements - Yes                              | -9.1911         | 5.0620     | 0.0710   |
| Cough Disrupted Daytime Activity - Yes                | 8.8910          | 4.6009     | 0.0548   |
| Cough Disrupted Night - Yes                           | 4.3623          | 5.4149     | 0.4215   |

|                                                                         |                 |         |        |
|-------------------------------------------------------------------------|-----------------|---------|--------|
| Coughed More in Night or Day - Night                                    | -0.2144         | 5.5636  | 0.9693 |
| Knows Appetite loss or Weight loss is Symptom of TB - Yes               | -10.7675        | 5.4131  | 0.0481 |
| Knows Bone or joint pain is Symptom of TB - Yes                         | 3.8836          | 18.4065 | 0.8331 |
| Knows Coughing blood or chest pain is Symptom of TB - Yes               | -9.7387         | 4.4903  | 0.0313 |
| Knows Malaise is Symptom of TB - Yes                                    | -10.8044        | 12.1545 | 0.3752 |
| Knows Night sweats or fever is Symptom of TB - Yes                      | -7.2979         | 4.9849  | 0.1448 |
| Experienced, or was concerned about, Appetite loss or Weight loss - Yes | 3.4654          | 5.5094  | 0.5301 |
| Experienced, or was concerned about, Bone or joint pain - Yes           | 5.4139          | 4.9974  | 0.2800 |
| Experienced, or was concerned about, Coughing blood or chest pain - Yes | -24.3259        | 13.0023 | 0.0629 |
| Experienced, or was concerned about, Malaise - Yes                      | -2.0160         | 4.8288  | 0.6768 |
| Experienced, or was concerned about, Night sweats or fever - Yes        | -6.3856         | 8.0199  | 0.4269 |
| Bloody Sputum Prompted Care-Seeking - Yes                               | -4.7599         | 7.6342  | 0.5337 |
| Frequent Cough Prompted Care-Seeking - Yes                              | 0.2810          | 4.5841  | 0.9512 |
| Reported No Prompts to Seek Care                                        | -9.4404         | 22.4767 | 0.6749 |
| No Relief from Self-Medication Prompted Care-Seeking - Yes              | -0.7855         | 5.4238  | 0.8850 |
| Painful Cough Prompted Care-Seeking - Yes                               | 0.6543          | 5.6143  | 0.9073 |
| TV/Radio Advertisement Prompted Care-Seeking - Yes                      | -1.2755         | 5.7225  | 0.8239 |
| Sought Care for Appetite loss or Weight loss - Yes                      | -4.0702         | 7.0203  | 0.5627 |
| Sought Care for Bone or joint pain - Yes                                | 37.3770         | 10.4569 | 0.0004 |
| Sought Care for Coughing blood or chest pain - Yes                      | 7.8583          | 4.9804  | 0.1162 |
| Sought Care for Malaise - Yes                                           | 5.1280          | 13.1151 | 0.6962 |
| Sought Care for Night sweats or fever - Yes                             | -1.1095         | 4.8303  | 0.8186 |
| Evaluated for TB due to Appetite loss or Weight loss - Yes              | -2.6396         | 5.1245  | 0.6071 |
| Evaluated for TB due to Bone or joint pain - Yes                        | 21.2483         | 8.6431  | 0.0148 |
| Evaluated for TB due to Coughing blood or chest pain - Yes              | -3.6927         | 4.5350  | 0.4165 |
| Evaluated for TB due to Malaise - Yes                                   | -9.2973         | 13.1031 | 0.4788 |
| Evaluated for TB due to Night sweats or fever - Yes                     | -6.3304         | 4.5396  | 0.1648 |
| DX Location - Government facility                                       | <i>Baseline</i> |         |        |
| DX Location - Private facility                                          | 0.6273          | 4.6140  | 0.8920 |

\*UGX, Ugandan Shillings. In the study year, 2017, the conversion rate for 1 US dollar was 3616.24 UGX.

\*\*Coefficient should be read as the increase in delay days associated with each increase of 0.1 in the proportion of contacts that belong in the non-TB provider category

#### 4. Residuals of models

There are minor skews associated with ~5 or 6 outlying values of delay in the linear model selected and presented in the text. Below, Q-Q plots for the selected linear model, as well as two other tested models (log-transforming the outcome and using a Poisson model) are shown. Q-Q plots are shown for the primary outcome models (community contact delay).

Supplemental figure 1: Q-Q Plot for selected linear model.

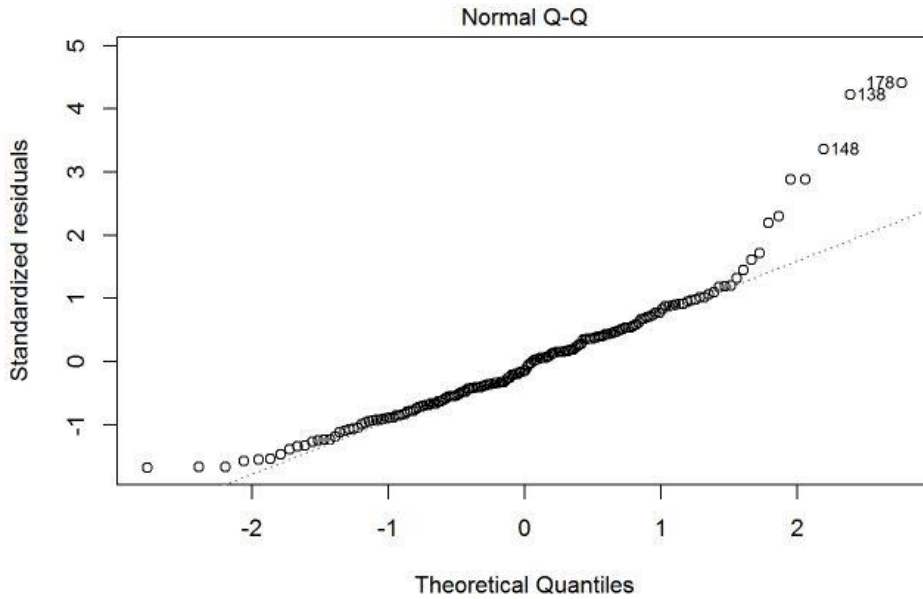

Supplemental figure 2: Q-Q plot for model with log-transformed outcome.

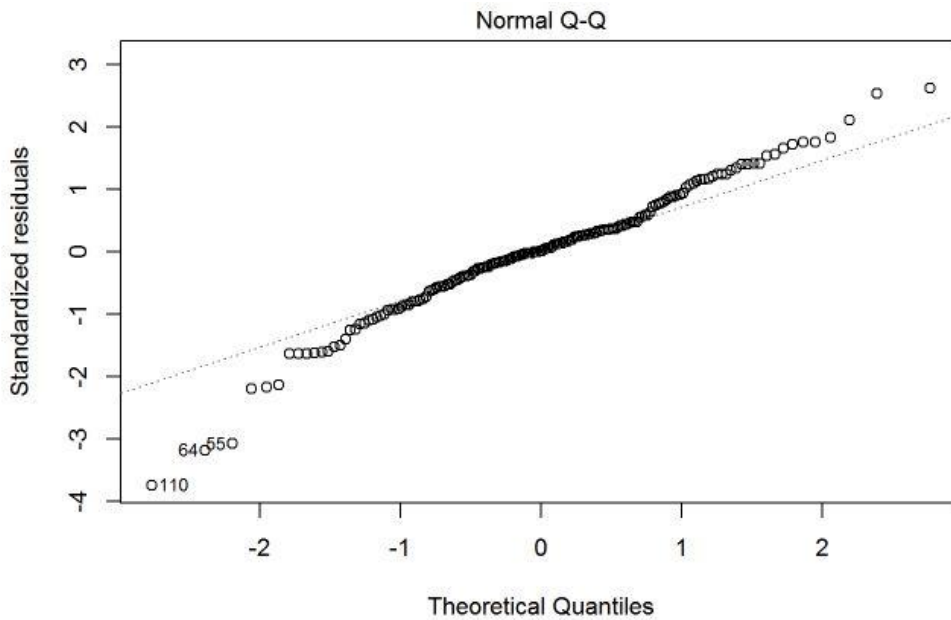

Supplemental figure 3: Q-Q plot for Poisson model.

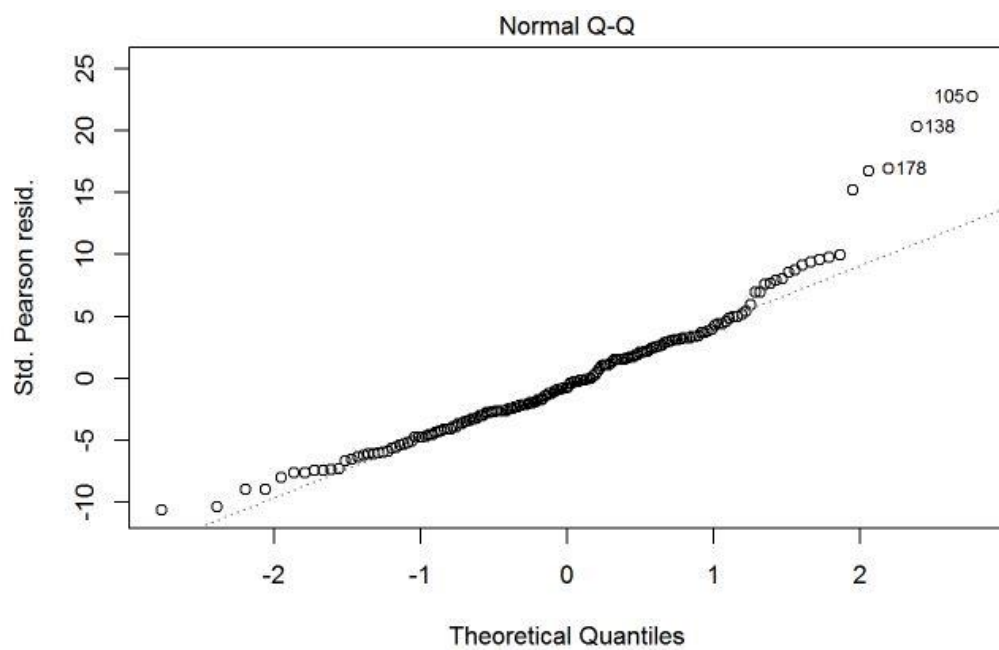

### 5. Results from previous study: Diagnostic I.

The results of our previous study, Diagnostic I, led to the expansion of the survey used to collect data and the second retrospective cohort study, Diagnostic II. Most of the results of Diagnostic I can be found in a previously published paper (1).

In addition to analyzing the Diagnostic II data to explore predictors of community contact delay, we also used the data of the original Diagnostic study to answer the same question. As different variables were collected in each study, we could not combine the data. We fit separate models for our primary outcome, community contact delay. The results of the Diagnostic II models are presented in the main text. Below, the results of the linear models of community contact delay with the limited set of predictors collected in Diagnostic I are shown.

**Supplemental Table 3: Complete results of bivariate linear regression for all included predictors: Diagnostic I**

| Variable                                                              | Estimate | Pr(> t ) |
|-----------------------------------------------------------------------|----------|----------|
| Age                                                                   | -4.1556  | 0.2561   |
| Income*                                                               | -0.2230  | 0.9513   |
| Proportion of contacts in non-TB provider category (10% increments)** | 3.2840   | 0.0000   |
| Sex - Male                                                            | 4.9130   | 0.5059   |
| Marital Status - Currently married                                    | 16.0967  | 0.0327   |
| Employed - Yes                                                        | -6.0350  | 0.5341   |
| HIV Status - Positive                                                 | -0.2230  | 0.9510   |
| First TB - No                                                         | -25.495  | 0.0027   |

|                                           |         |        |
|-------------------------------------------|---------|--------|
| Patient suspected illness was TB          | -8.2600 | 0.3320 |
| Family suspected TB - Yes                 | 15.6091 | 0.0517 |
| Knows how TB is transmitted - Yes         | -0.0607 | 0.9930 |
| Has chronic illness – Yes                 | 21.2260 | 0.2510 |
| Owens phone - No                          | 4.5550  | 0.6220 |
| Smoking status - current or former smoker | 3.1450  | 0.7200 |

\*UGX, Ugandan Shillings. In the study year, 2013, the conversion rate for 1 US dollar was approx. 2570 UGX.

\*\*Coefficient should be read as the increase in delay days associated with each increase of 0.1 in the proportion of contacts that belong in the non-TB provider category

#### **Supplemental Table 4: Results of linear regression (with LASSO regularization) models of community contact delay: Diagnostic I**

**Model R<sup>2</sup>: 0.26**

| <b>Variable</b>                                                       | <b>Estimate</b> |
|-----------------------------------------------------------------------|-----------------|
| Marital status – currently married                                    | 0.4746          |
| Family suspected TB – Yes                                             | 0.0753          |
| Income*                                                               | -3.7401         |
| HIV Status – Positive                                                 | -2.9504         |
| Owens phone – No                                                      | 6.2131          |
| Proportion of contacts in non-TB provider category (10% increments)** | 2.9218          |

\*UGX, Ugandan Shillings. In the study year, 2013, the conversion rate for 1 US dollar was approx. 2570 UGX.

\*\*Coefficient should be read as the increase in delay days associated with each increase of 0.1 in the proportion of contacts that belong in the non-TB provider category

#### 6. References

1. Sekandi JN, Zalwango S, Martinez L, Handel A, Kakaire R, Nkwata AK, et al. Four Degrees of Separation: Social Contacts and Health Providers Influence the Steps to Final Diagnosis of Active Tuberculosis Patients in Urban Uganda. BMC Infect Dis. 2015;

#### Appendix 1: Diagnostic II Survey (English).

The English version of the survey used in the Diagnostic II survey:



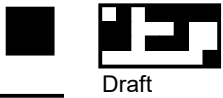

**MAKERERE UNIVERSITY-UNIVERSITY OF GEORGIA RESEARCH COLLABORATION  
COMMUNITY HEALTH AND SOCIAL NETWORKS OF TUBERCULOSIS  
DIAGNOSTIC PATHWAY II FORM\_ENGLISH**

Draft

Date of Interview  /  /  2 0    
Day Month Year

1. In which division do you live? [Prompt]

|                      |                      |             |
|----------------------|----------------------|-------------|
| <input type="text"/> | 01=Rubaga            | 04=Kawempe  |
| <input type="text"/> | 02=Nakawa            | 05=Makindye |
| <input type="text"/> | 03=Central           | 88=Other    |
|                      | <input type="text"/> |             |

2. How old are you?  [Yrs]

3. Sex  Male  Female

3a. What is the highest level of education you attained?

- None
- Primary Level
- Secondary Level
- Post secondary specialization
- University degree

4. What is your marital status?

|                      |                           |
|----------------------|---------------------------|
| <input type="text"/> | 01 = Single/Never married |
|                      | 02 = Married/Cohabiting   |
|                      | 03 = Separated/divorced   |
|                      | 04 = Widowed              |

5. Are you employed?  Yes  No

6. What is your main occupation? Whether you earn or don't earn an income from it

7. On average, how much money do you earn in a month from all you jobs?

Shs

8. What is the combined income of all household members including yours?

Shs

9. Is this your first TB episode?  Yes  No

10. When did you receive your current TB diagnosis?

*Please check the TB card*

/  /  2 0    
Day Month Year

11. Where was your current TB diagnosed?

|                      |                                        |
|----------------------|----------------------------------------|
| <input type="text"/> | 01 = Private clinic                    |
|                      | 02= Private Hospital                   |
|                      | 03 = KCCA /Govt clinic                 |
|                      | 04= Gov't Hospital                     |
|                      | 88= Other,specify <input type="text"/> |

12. What method was used to diagnose your TB

- Sputum smear  Chest X-ray
- GeneXpert  Sputum culture

13. If smear was done, what was the result?

- Smear negative  smear +++
- Smear +  Smear scanty
- Smear ++  N/A

14. When you first noticed your cough, did you contact anyone for advise?  Yes  No  N/A

15. Who did you contact first for advise when you noticed that you had cough?

- Parent/sibling/relative  Health provider at clinic
- Friend  N/A
- Work mate  Other,Specify
- Freind (health worker)

16. After noticing cough or other symptoms what prompted you to take the first step to seek help?

- No relief from meds  Uncertain
- Frequent coughing  Other,Specify
- chest pain associated with cough  N/A
- Coughed up blood

17. For how long did you have your cough, before you received this TB diagnosis? diagnosis someone for advice or

Days  Weeks  Months

18. For how long did you have these symptoms before you first sought advice from any person who is not a health provider about what to do?

Days  Weeks  Months

Int Initials:   
Rev Initials:   
DMO Initials:   
CD Initials:

Comp Date:  /  /  2 0    
Rev Date:  /  /  2 0    
DMO Date:  /  /  2 0    
CD Date:  /  /  2 0    
Day Month Year

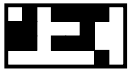

19. For how long did you have your cough or other symptoms before first sought treatment from a health provider or facility?

Days   Weeks   Months

20. Did you receive any medicines for treatment of your cough?  Yes  No

21. If YES, how many times did you receive the medicines for your cough?

22. List the sources of the medicines you received for your cough

- Drug store/pharmacy
- Traditional healer
- Mobile van/Vendor
- Private clinic
- Hospital
- Other (Specify)

23. What prompted you to get health advise at the specific place where you received your TB diagnosis?

- No relief from medicine
- Persistent/worsening symptoms  Other, Specify
- heard TB message on TV/radio
- Coughed up blood
- Referred by health provider at clinic
- referred by non health provider

**Assessment of severity of cough**

24. How would you rate the overall severity of your cough in the first two weeks after the onset?

- Mild cough
- Moderate cough
- Severe cough

25. How would you rate the overall severity of your cough before the TB diagnosis?

- Mild cough
- Moderate cough
- Severe cough

26. How would you rate the overall severity of your cough in the seven days preceding your TB diagnosis?

- Mild cough
- Moderate cough
- Severe cough

28. Would you say your cough disrupted your daytime activities?  Yes  No

28. Would you say your cough disrupted your night time sleep?  Yes  No

29. Would you say your cough bothered you most at night or during day?  Day  Night

30. On the days when you coughed, how often did you cough?  
 Rarely, Once a day  
 Often (Many times but not every hour)  
 Not so often (coughs occasionally)  
 Almost all the time

31. How often did you cough in a week?  
 Less than one day  I dont recall  
 1-3 days/week  
 4-6 days/week  
 Every day

32. Prior to the diagnosis of your TB, when you coughed did you cough up sputum?  Yes  No

33. Prior to the diagnosis of your TB, when you coughed did you see blood in your sputum?  Yes  No  N/A

34. Prior to diagnosis of your TB, did your cough make you feel short of breath?  Yes  No

35. Prior to diagnosis of your TB, was your cough associated with chest pain?  Yes  No

**Knowledge Assessment**

36. Please, tell me some of the symptoms of TB that you knew about before receiving your diagnosis? **[Do not prompt respondents]** Mark all that apply

- Chronic cough
- Weight loss
- Loss of appetite
- Chest pain
- Malaise
- Bone/Joint pain
- Night sweats
- Fever
- coughing up blood
- None

37. Which symptoms below did you experience?

- Night Sweats
- Loss of Appetite
- Weight Loss
- Chest Pain
- Fever
- Malaise
- Bone/Joint pains
- Coughing blood
- Cough for more than 2 weeks
- N/A

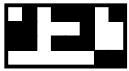

38. Which symptoms above apart from cough concerned you? Check all that apply.

- Night Sweats
- Loss of Appetite
- Weight Loss
- Chest Pain
- Fever
- Malaise
- Bone/Joint pains
- Coughing blood
- N/A

39. Did you seek any healthcare for any of the symptoms above?  Yes  No  N/A

40. If YES which symptoms? Code 01 if present, 02 absent

- Night Sweats
- Loss of Appetite
- Weight Loss
- Chest Pain
- Fever
- Malaise
- Bone/Joint pains
- Coughing blood
- N/A

41. Which symptoms prompted you to seek evaluation for TB? Code 01 for Yes and 02 for No

- Night Sweats
- Loss of Appetite
- Weight Loss
- Chest Pain
- Fever
- Malaise
- Bone/Joint pains
- Coughing up blood
- N/A

42. Did you think you had TB before you were diagnosed?

- Yes
- No

43. Did someone else, such as a family member or friend, express concern about your illness before your TB diagnosis was made?  Yes  No

**HIV Status and Comorbidities**

44. What is your HIV status?

- Positive
- Negative
- Dont Know

45. Are you currently taking antiretroviral therapy?

- Yes
- No
- N/A

46. Have you ever been diagnosed with any of the following medical conditions(s)?

**01 = Yes**  
**02 = No**  
**77 = Uncertain**  
**88= Other**

Diabetes:

Cancer

Kidney disease:

Liver disease:

Asthma:

Others(specify):

47. What is your current smoking status?

- Never smoked
- Current smoker
- Former smoker

48. For current smokers and past smokers, ask How long have you /did you smoke?

Days  Weeks  Months

49. Do you drink alcohol?  Yes  No

50. If YES, for how long have you been drinking alcohol?

Days  Weeks  Months

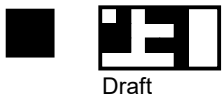

Draft

Part B

Date of Interview [ ] [ ] / [ ] [ ] / 2 0 [ ] [ ]
Day Month Year

STUDY ID# [ ] [ ] [ ]

51. Preamble to be read by interviewer: Now, think back about when you first noticed your symptoms of TB. We are interested in knowing the people you talked to about your symptoms and the places you may have sought care after you started feeling ill. Please tell me about what you did, who you confided in about your illness, or where you went to seek help before you had the final diagnosis of TB. Remember, this could be a family member, relative, friend, co-worker or any health provider or facility. I also want to know if you talked to the same person or visited the same place for help more than once. [Interviewer: Be sure to document separately each time a person or place is mentioned by the patient even if they are the same]

Now to begin, please tell me the first person/place you approached when your symptoms began. Remember, this may be a family member or friend. [Collect and Record].....Good, can you tell me the NEXT person or place after that? [Collect & Record] [Continue with this line of questioning, with appropriate prompting and explanation, until patient indicates the place of diagnosis].

Table with 7 columns: Contacts, Contact Person or Place, Contact Code, Lab code, Household member, Time btn contact, Unit for Time. Rows 1-17.

USE THE CODES BELOW TO COMPLETE TABLE ABOVE

Code for contact person or places visited QN: What person or place did you contact or visit for help/ treatment?

- 01 = Herbal healer 02 = Drug store 03 = Gov't hospital 04 = Private hospital 05= Private clinic 06 = Gov't Heath center 07= Village health worker 08 = Spouse 09 = Parent 10= Brother/sister 11=Other relative 12=Co-worker 13 = Friend 14=Child 15= Neighbor 88=Other 99=Not applicable

Code for Household Member QN: Does the person listed live in the same household as the patient?

- 01=Yes 02= No 99= Not applicable

Units for Time: QN: What time elapsed between the contacts..... [Refer to person or place listed above]

- 01 = Days 02 = Weeks 03 = Months 77=Uncertain

Code for Lab existence QN: Does this place have any Laboratory

- 01=Yes 02= No 99= Not applicable 77=Uncertain

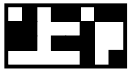

Draft

52. When you contacted or visited {Name of place/ person} How much money did you spend on Travel, Phone calls, Laboratory tests, medications Food, Care giver.

|          | Facility/Person | Travel | Phone Calls | Lab Test/<br>CXR | Medication | Food | Caregiver |
|----------|-----------------|--------|-------------|------------------|------------|------|-----------|
| Cont. 1  |                 |        |             |                  |            |      |           |
| Cont. 2  |                 |        |             |                  |            |      |           |
| Cont. 3  |                 |        |             |                  |            |      |           |
| Cont. 4  |                 |        |             |                  |            |      |           |
| Cont. 5  |                 |        |             |                  |            |      |           |
| Cont. 6  |                 |        |             |                  |            |      |           |
| Cont. 7  |                 |        |             |                  |            |      |           |
| Cont. 8  |                 |        |             |                  |            |      |           |
| Cont. 9  |                 |        |             |                  |            |      |           |
| Cont. 10 |                 |        |             |                  |            |      |           |
| Cont. 11 |                 |        |             |                  |            |      |           |
| Cont. 12 |                 |        |             |                  |            |      |           |
| Cont. 13 |                 |        |             |                  |            |      |           |
| Cont. 14 |                 |        |             |                  |            |      |           |
| Cont. 15 |                 |        |             |                  |            |      |           |
| Cont. 16 |                 |        |             |                  |            |      |           |
| Cont. 17 |                 |        |             |                  |            |      |           |

Explain briefly any unusual events in seeking care, costs or travels/movements as reported by the patient. For example if cost was incurred by someone else who is not the patient. This will help to provide additional information for data analysis and interpretation.

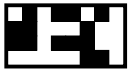

53. Before diagnosis, did you buy any supplements to your diet because of the TB illness, for example vitamins, meat, energy drinks, soft drinks or fruits?

Yes  No

54. If "YES", what kind of item was it?

|                |  |  |
|----------------|--|--|
| Fruit          |  |  |
| Drinks         |  |  |
| Vitamins/herbs |  |  |
| Meat           |  |  |
| Other Specify  |  |  |

55. How much in total did you spend on these items (s)

Shs

56. On average, how much did you spend on your health when seeking care before your TB diagnosis?

Shs

57. Before you were diagnosed with TB, did you ever miss days of school/work/housework because of TB

Yes  No

58. How many days did you miss work/school/housework due to your TB prior to your diagnosis

Days

59. Did anyone stay home specifically to take care of you because you were sick?

Yes  No

60. How many fewer hours per day did you work?

61. Before you were diagnosed, were you hospitalised for TB illness?

Yes  No

62. How long did you stay in hospital?

Days

63. How much in total did you pay for your hospital stay

Shs

**Costs associated with TB illness**

64. On average how much did you spend per month on your own healthcare BEFORE the onset of TB symptoms

Shs

65. On average how much did you spend per month on your own healthcare after the onset of cough and other

Shs

66. On average how much do you spend on your own healthcare NOW after your TB diagnosis?.

Shs

67. We know that TB treatment is free, so since you got your TB diagnosis what did you spend you money for?

- Other medicines e.g Pyridoxine
- Transport to the clinic for medication
- Buying a drink/eating while at the clinic
- Supplementing nutritious foods at home
- other [Specify]
- N/A

68. Did you quit job or change jobs or quit school because of your TB illness?

- No
- YES- Changed school
- YES- Quit school
- N/A
- YES-Quit job
- other [Specify]
- YES-Changed job

69. Did you lose any daily income/earnings during this episode of illness?

Yes  No  N/A

70. How much money would you say you lost per day before diagnosis?

Shs

Ask patient to explain how income was lost?

**Dissavings associated with TB illness Prior to Diagnosis**

71. Did you borrow any money to cover costs due to illness? [This includes costs for travel, phonecalls, medicines food, etc]  Yes  No

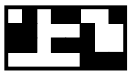

72. How much money did you borrow?

Shs

73. From whom did you borrow?

- Family member
- neighbors/friends/workmates
- Bank
- Private money lender
- other [specify]
- N/A

74. How much money total are you expected to pay or have you paid back for the amount you borrowed?

Shs

75. When are you supposed to pay back this borrowed money? Code 00 in all boxes if not expected to pay?

Days  Weeks  Months

76. Did your spouse/relative in your household borrow money to finance costs due to your current TB illness?

Yes  No

77. How much did your spouse/relative in your household borrow to pay for costs due to your current TB illness? Code 000000 in didnot borrow

Shs

78. Have you sold any of your property to finance the costs of TB illness  Yes  No

79. If YES what did you sell?

- Land
- Livestock/Chickens
- Farm produce
- Household item
- Other [Specify]
- N/A

80. What is the estimated market value of the property you sold? Code 0000000 if no property sold

Shs

81. List all items sold and the amount earned in Ug shs

| ITEM                 | COST (UgShs)                                                                                                                                                            |
|----------------------|-------------------------------------------------------------------------------------------------------------------------------------------------------------------------|
| <input type="text"/> | <input type="text"/> |
| <input type="text"/> | <input type="text"/> |
| <input type="text"/> | <input type="text"/> |
| <input type="text"/> | <input type="text"/> |
| <input type="text"/> | <input type="text"/> |

82. Did any of your children below the age of 18 years work to finance costs due to your current TB illness?

Yes  No

83. Did any of your children below the age of 18 years miss school to take care of you or accompany you to seek care during your current TB illness?

Yes  No

84. Olina essimu eyomungalo ?  Yes  No (END HERE)

85. Oba "YE" Kikka kya ssimu ki kyolina?

- Smart/Touch phone
- Non touch phone
- Both
- N/A

86. Omaze banga ki ne ssimu eyo?

Days  Weeks  Months  Yrs

87. Mbulira enamba zessimu sokozesezza okumala emyezi esatu egiyise nga wagiwandisa mumanya go.

Line one

Line two

88. Did patient consent for Cellphone research?

Yes  No
